# Supplementary material for: The Sarcoptic Mange in Maned Wolf (Chrysocyon brachyurus): Mapping an Emerging Disease in the Largest South American Canid
Source: MDPI journal article supplement (doi:10.3390/pathogens12060830), 2023-06-15
Supplement: s1 [file s1]

Supplementary material of the manuscript entitled “The sarcoptic mange in maned wolf (*Chrysocyon brachyurus*): mapping an emerging disease in the largest South American canid”

**Table S1.** General data of captured wolves and sarcoptic mange diagnosis.

| Individuals | Sex    | Weight (kg) | Estimated age | Diagnostic method | Result   |
|-------------|--------|-------------|---------------|-------------------|----------|
| Cbr 1       | Male   | 21          | 5 years-old   | Histopathological | Positive |
| Cbr 2*      | Male   | 32,5        | 3 years-old   | Histopathological | Negative |
| Cbr 3*      | Female | 25          | 4 years-old   | Histopathological | Negative |
| Cbr 4       | Male   | 30          | 5 years-old   | Skin scraping     | Positive |
| Cbr 5*      | Female | 23          | 2 years-old   | Skin scraping     | Negative |
| Cbr 6       | Female | 24          | 5 years-old   | Histopathological | Positive |
| Cbr 7       | Male   | 21          | 10 months-old | Skin scraping     | Positive |
| Cbr 8*      | Male   | 29          | 6 years-old   | Histopathological | Negative |
| Cbr 9*      | Male   | 28          | 4 years-old   | Skin scraping     | Negative |
| Cbr 10      | Female | 28          | 5 years-old   | Histopathological | Positive |
| Cbr 11      | Female | 9           | 7 months-old  | Histopathological | Positive |
| Cbr 12      | Female | 10          | 7 months-old  | Histopathological | Positive |
| Cbr 13      | Male   | 15,4        | 4 years-old   | Histopathological | Positive |
| Cbr 14      | Male   | 28          | 6 years-old   | Skin scraping     | Positive |
| Cbr 48      | Female | 16,6        | 4 years-old   | Skin scraping     | Positive |

\*Included in G2A (the other were included in G1).
